# Supplementary material for: Ecosystem diversity in African savannas is fueled by pyrodiversity
Source: Research Square preprint supplement (doi:10.21203/rs.3.rs-6856850/v1), 2025-06-11
Supplement: Supplementary file 1 [file d50d55cb47d247b01bfe2c4c.pdf]

**Table S1.** General characterization of the study sites.

| Ecosystem    | Dominant species                                                                           | Parent material | Soil texture and fertility | Mean annual precipitation (mm) | Average biomass of standing herbaceous (g m <sup>-2</sup> ) | Burning success of annual burn treatment (%) |
|--------------|--------------------------------------------------------------------------------------------|-----------------|----------------------------|--------------------------------|-------------------------------------------------------------|----------------------------------------------|
| Dry          | <i>Colophospermum mopane</i> (Kirk ex Benth.) Kirk ex J. Leonard                           | Basalt          | Clayey nutrient rich soils | 480                            | 300                                                         | 29.8                                         |
| Intermediate | <i>Combretum collinum</i> Fresen. , <i>C. zeyheri</i> Sond. and <i>C. apiculatum</i> Sond. | Granite         | Sandy nutrient poor soils  | 650                            | 347                                                         | 75.8                                         |
| Wet          | <i>Terminalia sericea</i> Burch. ex DC. and <i>Dichrostachys cinerea</i> (L.) Wight & Arn. | Granite         | Sandy nutrient poor soils  | 740                            | 412                                                         | 70.0                                         |

- Average standing biomass is the averaged for 10 years of monitoring (Smith et al., 2013 )  
- Mean annual precipitation calculated for a 30 years average (Fick & Hijmans, 2017)

**Table S2.** Raw variables used in this study to describe savanna structure, function and taxonomic diversity.

|                                                                                   | Description                                                                                                  | Unit                |
|-----------------------------------------------------------------------------------|--------------------------------------------------------------------------------------------------------------|---------------------|
| <b>Structure variables</b>                                                        |                                                                                                              |                     |
| Dens. woody plants                                                                | Density of woody plants ( $\geq 0.5\text{m}$ height)                                                         | $\text{n ha}^{-1}$  |
| Max. crown area                                                                   | Maximum crown area of tall woody plants ( $\geq 0.5\text{m}$ height)                                         | $\text{m}^2$        |
| M crown area                                                                      | Maximum crown area of tall woody plants ( $\geq 0.5\text{m}$ height)                                         | $\text{m}^2$        |
| Cov. woody veg.                                                                   | Cover of woody vegetation in the entire ecosystem                                                            | %                   |
| Cov. herb. veg.                                                                   | Cover of herbaceous vegetation in the entire ecosystem                                                       | %                   |
| Cov. litter                                                                       | Cover of litter                                                                                              | %                   |
| Max canopy h                                                                      | Maximum canopy height of tall woody plants ( $\geq 0.5\text{m}$ height)                                      | m                   |
| M canopy h                                                                        | Mean canopy height of tall woody plants ( $\geq 0.5\text{m}$ height)                                         | m                   |
| Max cbh                                                                           | Maximum canopy base height of tall woody plants ( $\geq 0.5\text{m}$ height)                                 | m                   |
| M cbh                                                                             | Mean canopy base height of tall woody plants ( $\geq 0.5\text{m}$ height)                                    | m                   |
| <b>Function variables</b>                                                         |                                                                                                              |                     |
| S forms                                                                           | Richness of vascular plant forms (i.e., number of different forms) in the entire ecosystem                   | Unitless            |
| H forms woody                                                                     | Shannon diversity index of forms for tall woody vegetation ( $\geq 0.5\text{m}$ height)                      | Unitless            |
| H forms ground                                                                    | Shannon diversity index of forms in the ground vegetation ( $< 0.5\text{m}$ height)                          | Unitless            |
| Woody veg. C                                                                      | Carbon stored in the woody vegetation ( $\geq 0.5\text{m}$ height)                                           | $\text{Mg ha}^{-1}$ |
| Ground veg. C                                                                     | Carbon stored in the ground vegetation ( $< 0.5\text{m}$ height)                                             | $\text{Mg ha}^{-1}$ |
| Litter C                                                                          | Carbon stored in litter and plant debris                                                                     | $\text{Mg ha}^{-1}$ |
| BGB C                                                                             | Carbon stored in the belowground biomass of the ground vegetation ( $< 0.5\text{m}$ height)                  | $\text{Mg ha}^{-1}$ |
| Topsoil OC                                                                        | Organic C stored in the uppermost 5cm of the mineral soil                                                    | $\text{Mg ha}^{-1}$ |
| CN ratio                                                                          | Ratio between the soil organic carbon and soil total nitrogen                                                | Unitless            |
| $\text{NH}_4^+$ plus $\text{NO}_3^-$                                              | Concentration of ammonia nitrates in the uppermost 5cm of the mineral soil                                   | $\text{mg kg}^{-1}$ |
| Extractable P                                                                     | Concentration of extractable phosphorus in the uppermost 5cm of the mineral soil                             | $\text{mg kg}^{-1}$ |
| Extractable K                                                                     | Concentration of extractable potassium in the uppermost 5cm of the mineral soil                              | $\text{mg kg}^{-1}$ |
| <b>Taxonomic <math>\alpha</math>- and <math>\gamma</math>-diversity variables</b> |                                                                                                              |                     |
| S sp.                                                                             | Richness of vascular plant species in the entire ecosystem                                                   | Unitless            |
| S fam.                                                                            | Richness of vascular plant families in the entire ecosystem                                                  | Unitless            |
| S sp. woody                                                                       | Richness of vascular plant species in the woody vegetation ( $\geq 0.5\text{m}$ height)                      | Unitless            |
| S fam. woody                                                                      | Richness of vascular plant families in the woody vegetation ( $\geq 0.5\text{m}$ height)                     | Unitless            |
| H sp. woody                                                                       | Shannon diversity index for the vascular plant species in the woody vegetation ( $\geq 0.5\text{m}$ height)  | Unitless            |
| H fam. woody                                                                      | Shannon diversity index for the vascular plant families in the woody vegetation ( $\geq 0.5\text{m}$ height) | Unitless            |
| S sp. ground                                                                      | Richness of vascular plant species in the ground vegetation ( $< 0.5\text{m}$ height)                        | Unitless            |
| S fam. ground                                                                     | Richness of vascular plant families in the ground vegetation ( $< 0.5\text{m}$ height)                       | Unitless            |
| H sp. ground                                                                      | Shannon diversity index for the vascular plant species in the ground vegetation ( $< 0.5\text{m}$ height)    | Unitless            |
| H fam. ground                                                                     | Shannon diversity index for the vascular plant families in the ground vegetation ( $< 0.5\text{m}$ height)   | Unitless            |
| <b>Taxonomic <math>\beta</math>-diversity variables</b>                           |                                                                                                              |                     |
| JD sp.                                                                            | Turnover based on Jaccard distance over species presence-absence in the entire ecosystem                     | Unitless            |

|                |                                                                                                                                 |          |
|----------------|---------------------------------------------------------------------------------------------------------------------------------|----------|
| JD fam.        | Turnover based on Jaccard distance over families presence-absence in the entire ecosystem                                       | Unitless |
| JD sp. woody   | Turnover based on Jaccard distance over species presence-absence in the woody vegetation ( $\geq 0.5\text{m}$ height)           | Unitless |
| JD fam. woody  | Turnover based on Jaccard distance over families presence-absence in the woody vegetation ( $\geq 0.5\text{m}$ height)          | Unitless |
| BC sp. woody   | Turnover based on Bray-Curtis dissimilarities over species relative cover in the woody vegetation ( $\geq 0.5\text{m}$ height)  | Unitless |
| BC fam. woody  | Turnover based on Bray-Curtis dissimilarities over families relative cover in the woody vegetation ( $\geq 0.5\text{m}$ height) | Unitless |
| JD sp. ground  | Turnover based on Jaccard distance over species presence-absence in the ground vegetation ( $< 0.5\text{m}$ height)             | Unitless |
| JD fam. ground | Turnover based on Jaccard distance over families presence-absence in the ground vegetation ( $< 0.5\text{m}$ height)            | Unitless |
| BC sp. ground  | Turnover based on Bray-Curtis dissimilarities over species relative cover in the ground vegetation ( $< 0.5\text{m}$ height)    | Unitless |
| BC fam. ground | Turnover based on Bray-Curtis dissimilarities over families relative cover in the ground vegetation ( $< 0.5\text{m}$ height)   | Unitless |

---

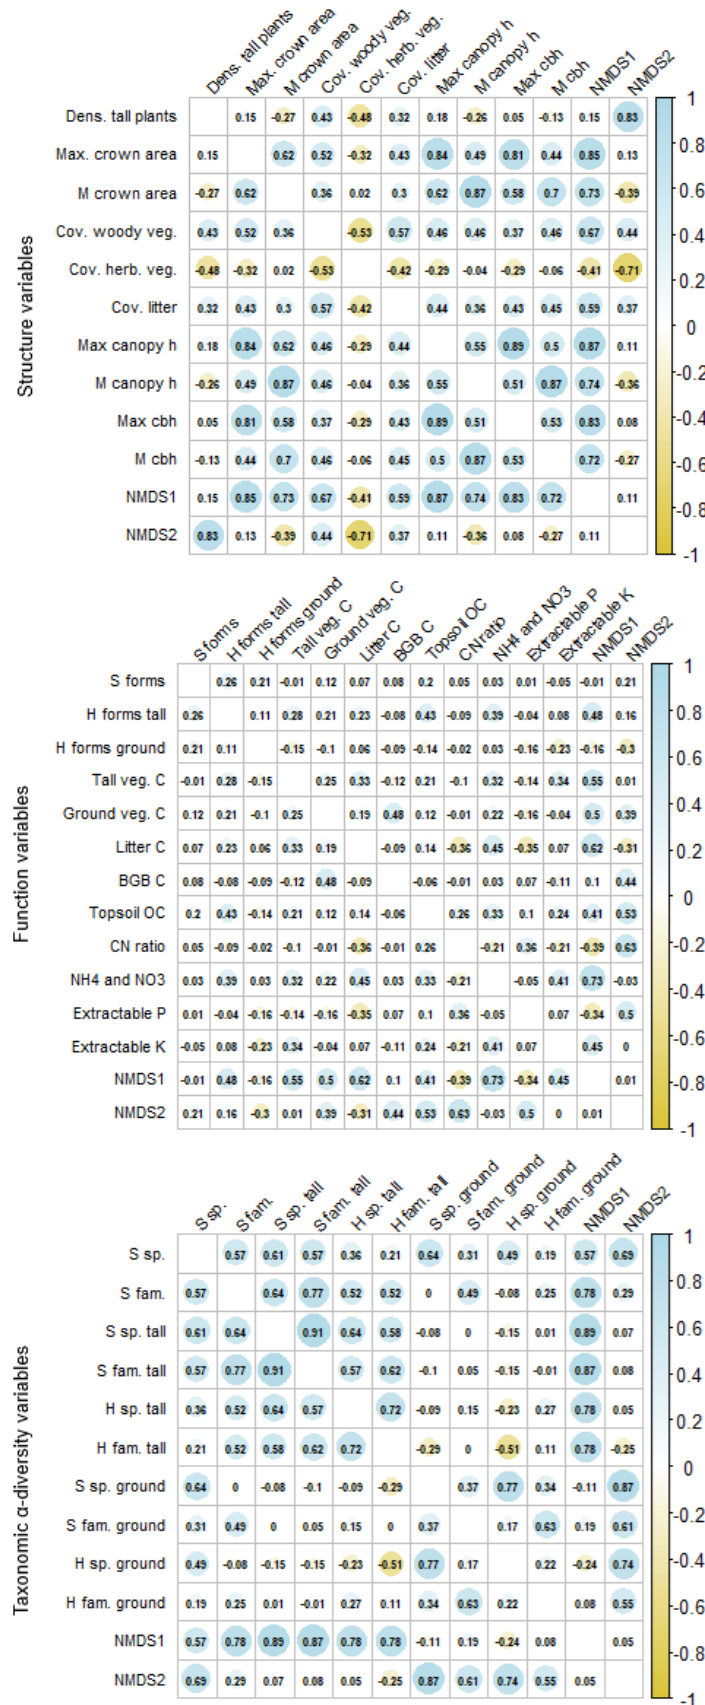

**Fig. S1.** Matrixes showing the Spearman's coefficients of the correlations between the studied structural (top), function (center) and taxonomic α-diversity variables. NMDS1 and NMDS2 represent the axis of the corresponding ordinations (see Fig. 2a, 2d, 2g).

**Table S3.** Spearman correlation coefficients between fire frequency and the two axis of the non-metric multidimensional scaling ordinations performed for ecosystem structure, function and taxonomic  $\alpha$ -diversity metrics.

|                               | Axis | Correlation coefficient ( $\rho$ ) | P            |
|-------------------------------|------|------------------------------------|--------------|
| Structure                     | 1    | -0.53                              | <b>0.000</b> |
|                               | 2    | -0.06                              | 0.661        |
| Function                      | 1    | -0.67                              | <b>0.000</b> |
|                               | 2    | 0.23                               | 0.116        |
| Taxonomic $\alpha$ -diversity | 1    | -0.47                              | <b>0.001</b> |
|                               | 2    | 0.02                               | 0.883        |

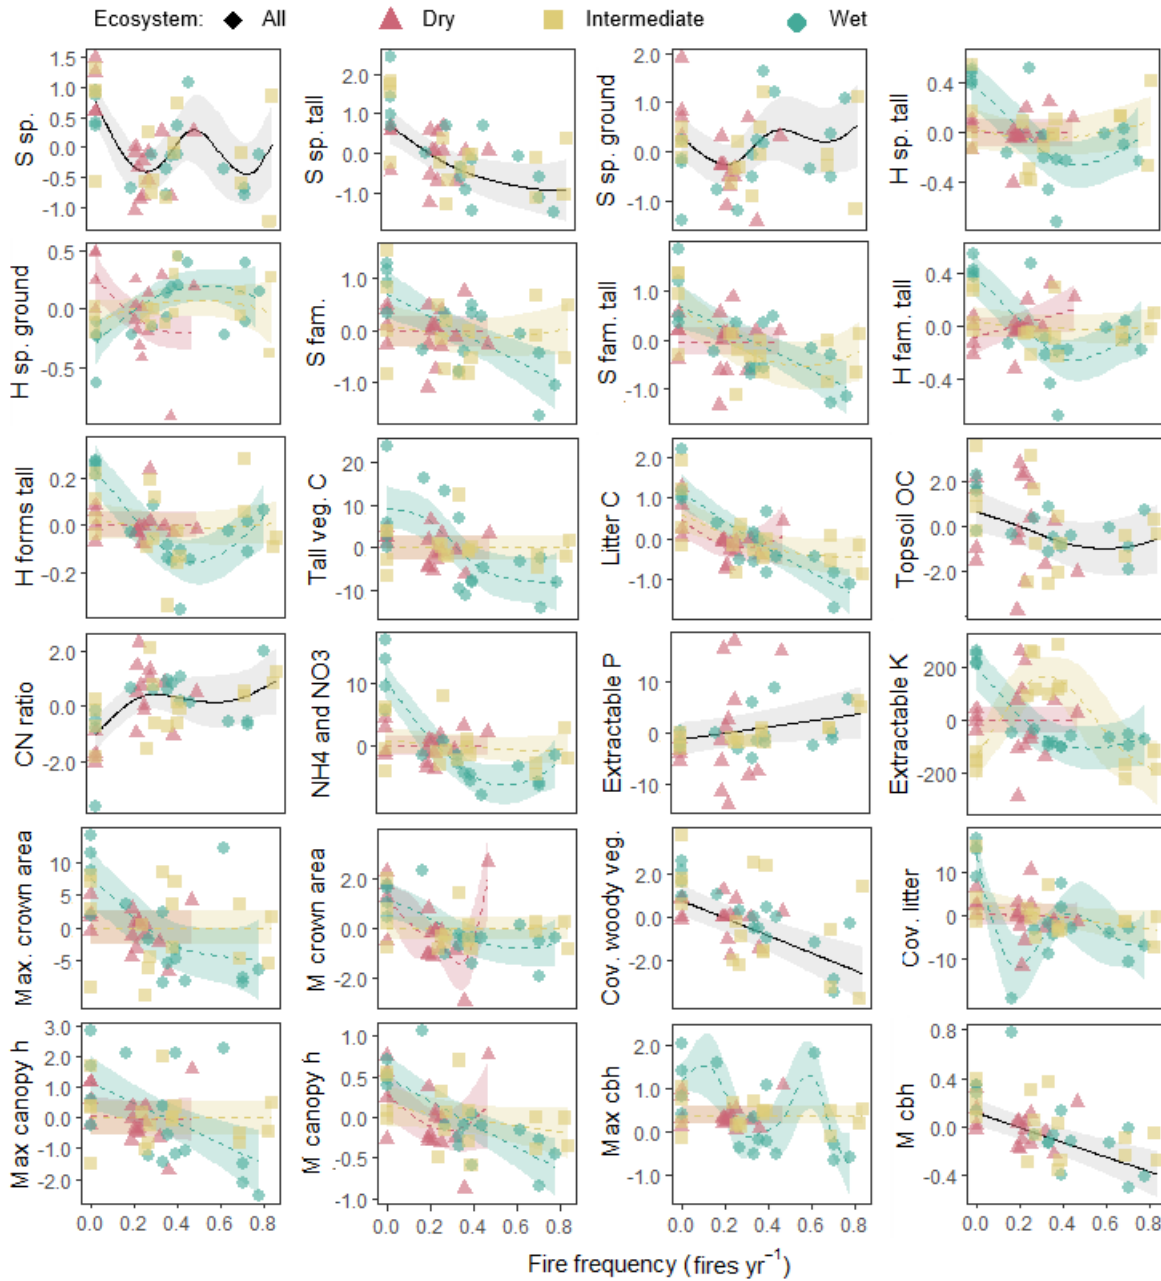

**Fig. S2.** Mean ( $\pm$  95% confidence interval) predicted values for each of the studied variables (residualized by string) in response to frequency. The interaction was retained in the generalized additive models only when significantly improved the model performance ( $P < 0.05$ ). Variables not significantly affected by fire frequency ( $P < 0.05$ ) are not shown in the panel. S: richness, H: Shannon diversity index, sp.: species, fam: families, OC: organic carbon, Max.: maximum, M: mean, Cov: cover, h: height, cbh: canopy base height. Variable units are available in Table S1.

**25 Table. S4.** Results of the permutational analysis of variance (PERMANOVA) exploring the effects of fire frequency on plant community composition. Species (sp.) and families presence-absence data were compared using Jaccard Distance (JD) matrices, and relative covers using Bray Curtis (BC) dissimilarity matrices. Analyses were performed for the entire community, for the tall stratum (woody vegetation  $\geq 0.5\text{m}$ ) and ground vegetation (vegetation  $< 0.5\text{m}$ ).

| Response distance matrix | Predictor                  | R <sup>2</sup> | F    | P            |
|--------------------------|----------------------------|----------------|------|--------------|
| JD sp.                   | Fire frequency             | 0.04           | 3.17 | <b>0.002</b> |
|                          | Fire frequency : ecosystem | 0.04           | 1.38 | 0.062        |
| JD fam.                  | Fire frequency             | 0.03           | 2.17 | <b>0.029</b> |
|                          | Fire frequency : ecosystem | 0.02           | 0.81 | 0.695        |
| JD sp. woody             | Fire frequency             | 0.05           | 3.52 | <b>0.001</b> |
|                          | Fire frequency : ecosystem | 0.03           | 0.99 | 0.464        |
| JD fam. woody            | Fire frequency             | 0.03           | 2.39 | <b>0.021</b> |
|                          | Fire frequency : ecosystem | 0.02           | 0.89 | 0.563        |
|                          | Fire frequency             | 0.06           | 6.41 | <b>0.001</b> |
| BC sp. woody             | Fire frequency : ecosystem | 0.04           | 1.80 | 0.069        |
|                          | Fire frequency             | 0.07           | 6.85 | <b>0.001</b> |
| BC fam. woody            | Fire frequency : ecosystem | 0.04           | 2.00 | 0.061        |
|                          | Fire frequency             | 0.04           | 2.88 | <b>0.002</b> |
| JD sp. ground            | Fire frequency : ecosystem | 0.04           | 1.31 | 0.108        |
|                          | Fire frequency             | 0.02           | 0.99 | 0.433        |
| JD fam. ground           | Fire frequency : ecosystem | 0.02           | 0.53 | 0.961        |
|                          | Fire frequency             | 0.06           | 5.03 | <b>0.001</b> |
|                          | Fire frequency : ecosystem | 0.05           | 2.01 | <b>0.008</b> |
| BC sp. ground            | Fire frequency             | 0.02           | 0.76 | 0.560        |
|                          | Fire frequency : ecosystem | 0.02           | 1.55 | 0.776        |

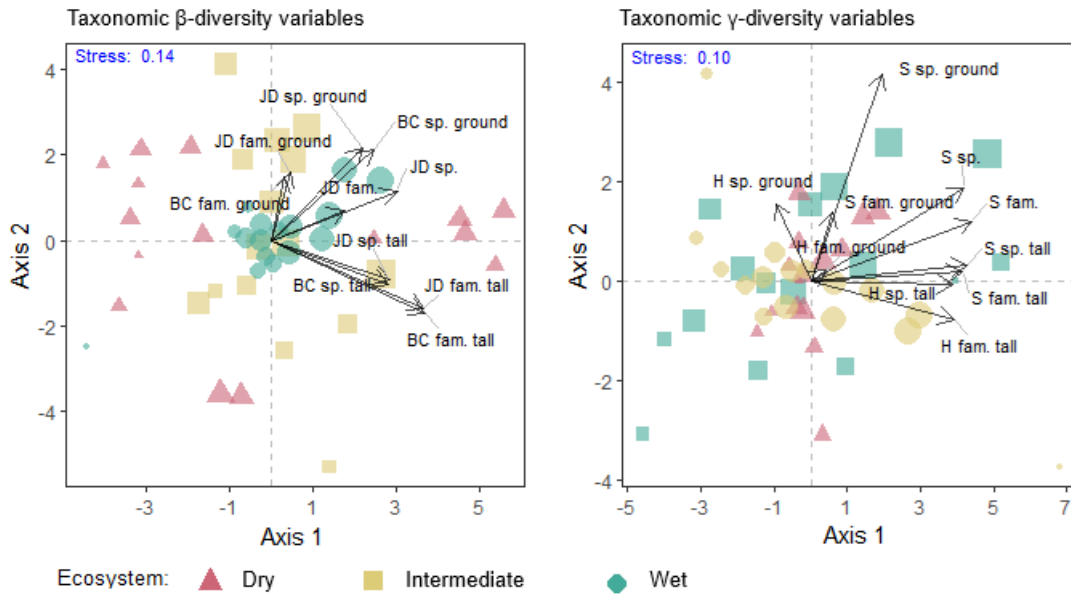

30

**Fig. S3.** Non-metric multidimensional scaling ordinations for  $\beta$ -diversity variables (left) and  $\gamma$ -diversity variables (right). Arrows indicate the direction and strength (length of the arrow) of the Spearman correlation of each variable with the two main ordination axes, and the size of the dots is proportional to pyrodiversity.



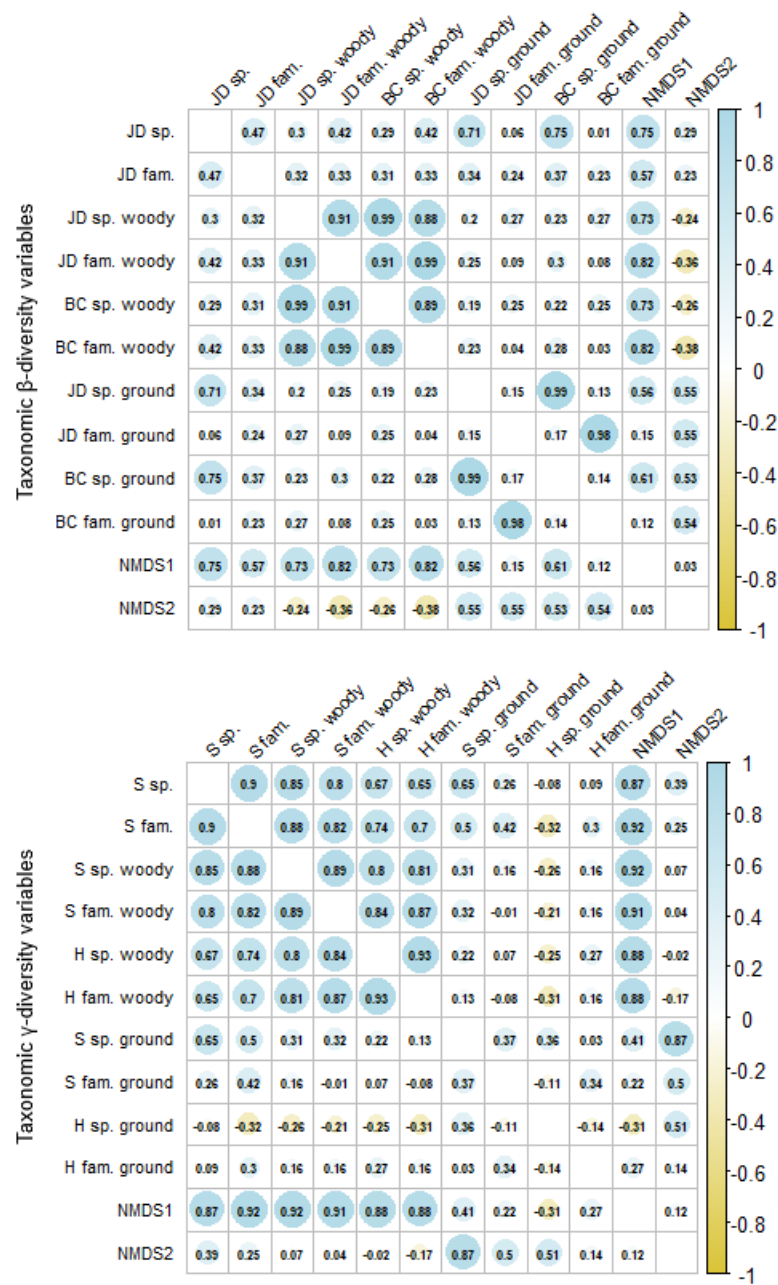

35 **Fig. S4.** Matrixes showing the Spearman's coefficients of the correlations between the studied  $\beta$ -diversity (top), and  $\gamma$ -diversity variables. NMDS1 and NMDS2 represent the axis of the corresponding ordinations (see Fig. S3).

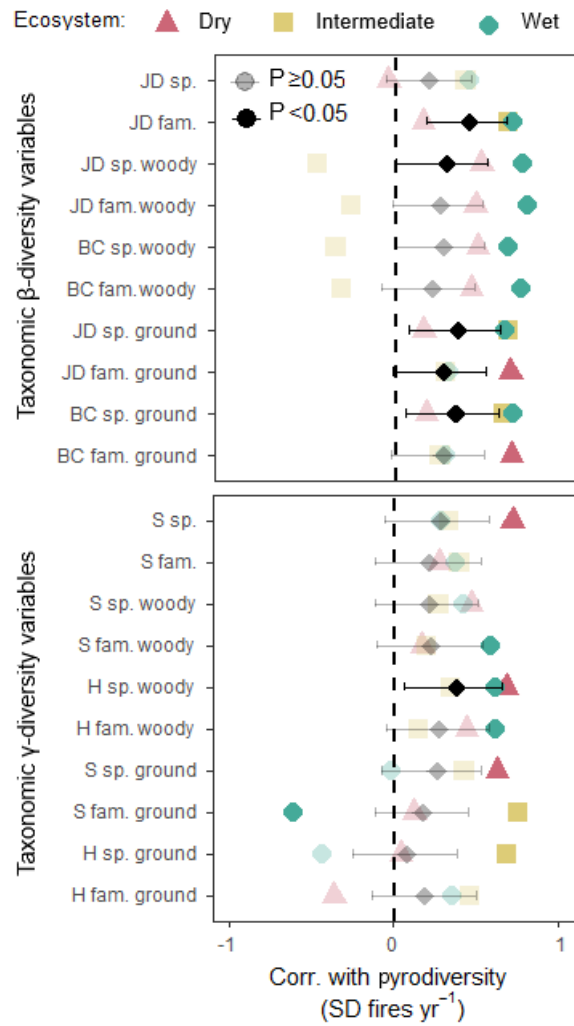

40 **Fig. S5.** Spearman correlation coefficients ( $\pm$  95% confidence intervals) and significance of the correlations between fire frequency and each of the taxonomic  $\beta$ -diversity and taxonomic  $\gamma$ -diversity raw variables. JC: Jaccard Distance, BC: Bray-Curtis dissimilarity, sp.: species, fam.: families, S: richness, H: Shannon diversity index.

45 **Table S5.** Spearman correlation coefficients between fire frequency and the axis of the non-metric multidimensional scaling ordinations performed for ecosystem taxonomic  $\beta$ -diversity and Taxonomic  $\gamma$ -diversity. Ordinations are available in Fig. S3.

|                               | Axis | Correlation coefficient ( $\rho$ ) | P     |
|-------------------------------|------|------------------------------------|-------|
| Taxonomic $\beta$ -diversity  | 1    | 0.44                               | 0.003 |
|                               | 2    | 0.25                               | 0.094 |
| Taxonomic $\gamma$ -diversity | 1    | 0.31                               | 0.034 |
|                               | 2    | 0.25                               | 0.085 |

50

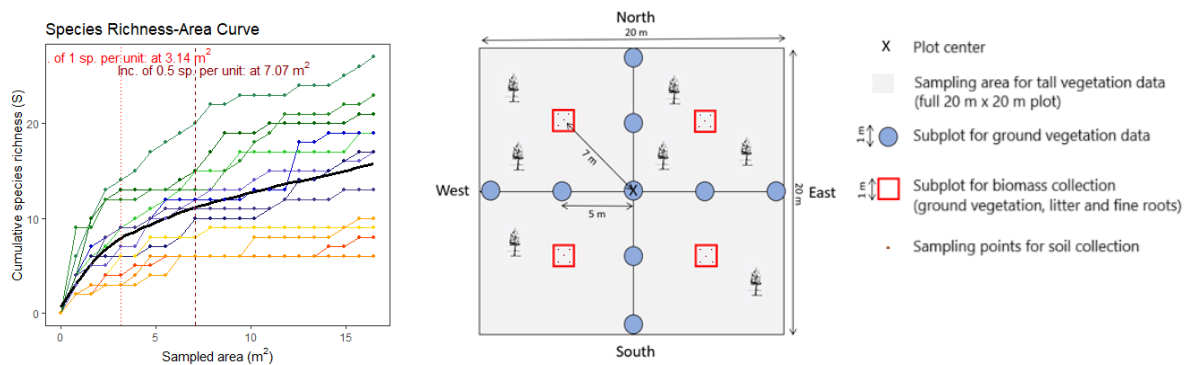

**Fig. S6.** The panel over the left shows the species richness-area curves obtained in one string per ecosystem. Each string is represented by a different color, with blue tones being the wet savanna, green tones the intermediate and yellow tones the dry savanna. The dotted lines in this panel show areas at which increases in one sampling unit (1m² subplot) led to increases in one and 0.5 species, respectively according to the loess curve fitting all the data (black line). The more conservative threshold (increases of less than 0.5 species per new subplot) was used to fix the size of the field sampling plots to 20 × 20 m, as shown in the panel over the right.

55
